# Supplementary material for: PUS1 is a novel biomarker for evaluating malignancy of human renal cell carcinoma
Source: publisher site journal article supplement (doi:10.18632/aging.204799), 2023-06-13
Supplement: Supplementary file [file aging-v15i11-204799-supplementary-material-SD1.pdf]

**SUPPLEMENTARY FIGURE**

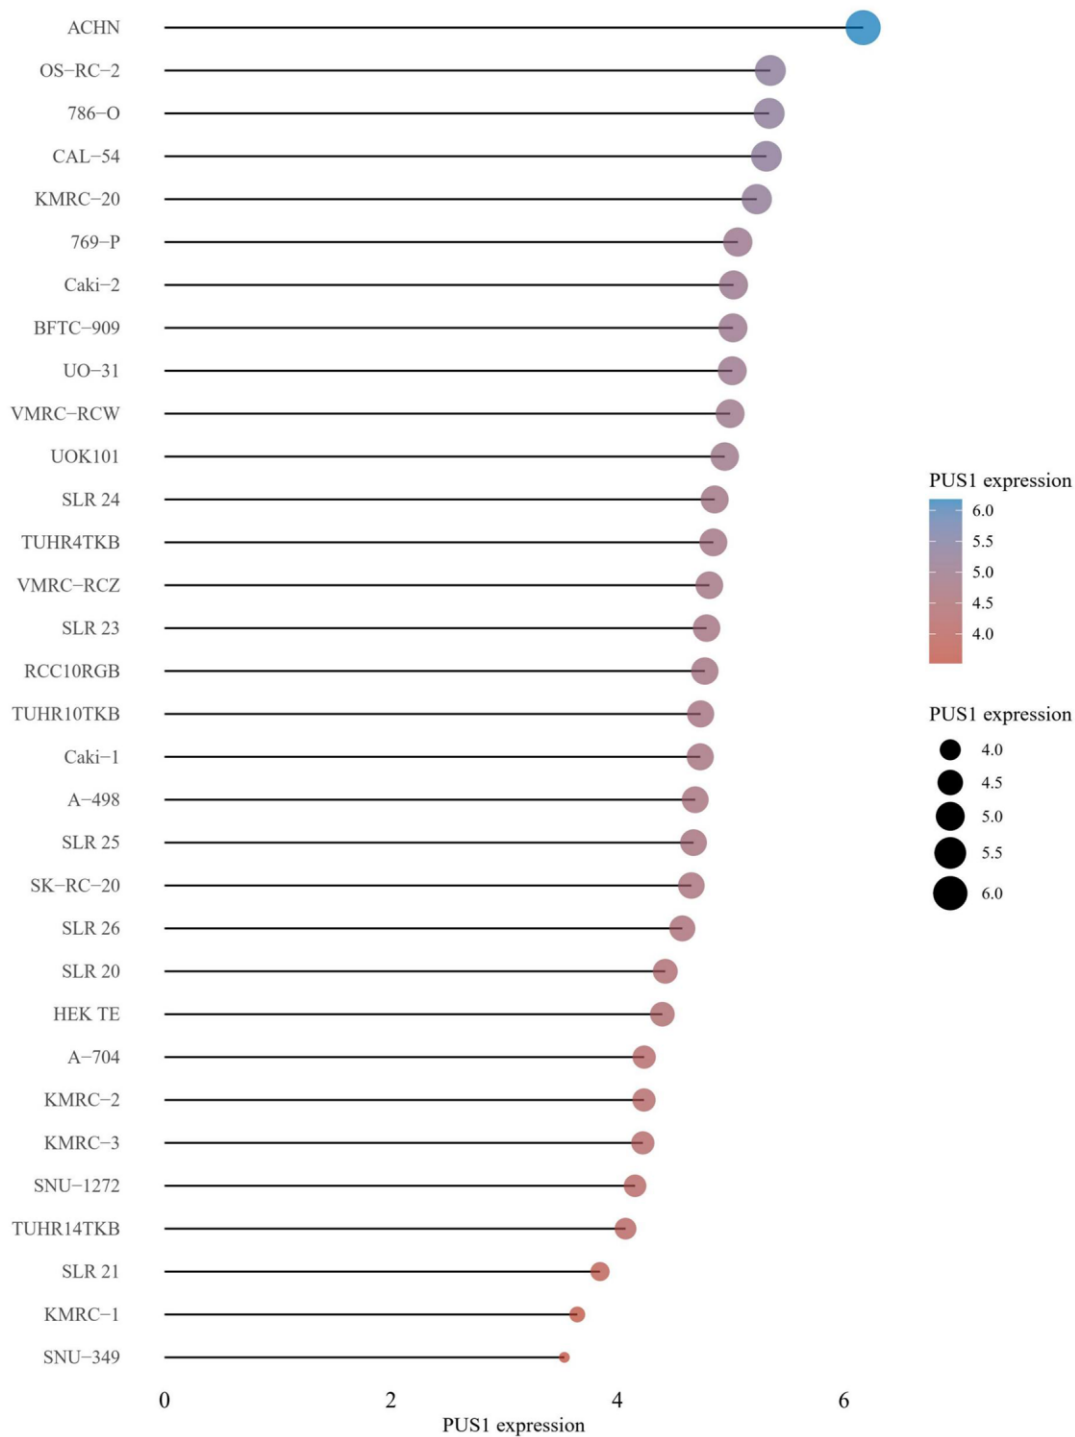

**Supplementary Figure 1. Data of *PUS1* mRNA expression analysis in 33 renal cancer cell lines from the CCLE portal.**
